# Supplementary material for: From Problem to Progress: Management of Rodents in Urban and Agricultural Settings in Sub-Saharan Africa.
Source: Preprints.org preprint supplement (doi:10.20944/preprints202301.0275.v3), 2023-12-07
Supplement: Supplementary file 2 [file supplementary]

**S1 Table. A list of work on rodent control in sub-Saharan Africa.**

Recent research programs and selected references specifically focusing on Ecologically-Based Rodent Management.

| **Program / website, reference** | **Specific country/region or modelling** | **Habitat** | **Purposes** |
| --- | --- | --- | --- |
|
|
| ACE IRPM & BTD (Rat-Tech), <https://www.sua.ac.tz/project/african-centre-excellence-rodent-pest-management-and-biosensor-technology-development>, see also <https://afrirodents.sua.ac.tz/> | Eastern and Southern Africa (Tanzania, Kenya, Uganda, Rwanda, Ethiopia, Malawi, Zambia and Mozambique) | rural | Research on rodent biology and management, reducing the impact of rodent pests on peoples’ livelihoods; and local capacity building |
| StapleRat (2000-2003), <https://cordis.europa.eu/project/id/ICA4-CT-2000-30029> | Tanzania, Ethiopia, Kenya, Zambia | rural | Integrated approaches for ecologically based field rodent pest management |
| RatZooMan (2003-2006), <http://projects.nri.org/ratzooman/> | Mozambique, South Africa, Tanzania, Zimbabwe | rural (also urban) | Program to setup and evaluate EBRM in rural communities |
| EcoRat (2007-2009), <http://projects.nri.org/ecorat/> | Namibia, Tanzania, South Africa, Swaziland | rural | Development of ecologically-based rodent management for the Southern African region |
| StopRats (2014-2016), <http://projects.nri.org/stoprats/> | Madagascar, Namibia, Sierra Leone, South Africa, Swaziland, Tanzania | rural | Program to setup and evaluate EBRM in rural communities |
| EcoRodMan (2018-2022), <https://ecorodman.nri.org/> | Tanzania, South Africa, Swaziland, Namibia, Ethiopia, Uganda | rural | Ecologically Based Rodent Management for Sustainable Agriculture and Food Security in Africa |
| Bridging ecology and economics to develop effective and sustainable rodent management strategies in rural Africa (2021-), <https://www.quadrat.ac.uk/projects/bridging-ecology-and-economics-to-develop-effective-and-sustainable-rodent-management-strategies-in-rural-africa/> | Madagascar, Tanzania | rural | Program to setup and evaluate EBRM in rural communities |
| SCARIA (2021-2023), <https://www.ird.fr/attenuation-communautaire-de-defis-lies-aux-rongeurs-en-milieu-urbain-africain> | Benin, Ethiopia, Madagascar, Niger | urban | Co-construction of community-based EBRM strategies in four urban pilot sites; setup of proxies able to evaluate rodent control efficiency |
| Actions intégrées d’anticipation, de prévention et de contrôle contre la pullulation des ravageurs dans les périmètres agricoles en Mauritanie et au Sénégal (2021-2022), <https://www.fao.org/emergencies/fao-in-action/stories/stories-detail/en/c/1430165/> | Mauritania, Senegal | rural | Rodent prevention and capacity building actions |
| Makundi et al., 1991 | Tanzania | rural | Observations on pest rodent biology and control |
| Leirs et al., 1996 | Tanzania | rural | Research on pest rodent biology in a control perspective |
| Mwanjabe et al., 1997 | Tanzania | rural | Implementation of an early warning system for IPM-based rodent control |
| Makundi et al., 1999 | Eastern Africa | rural | Review on pest rodent management and opportunities for EBRM |
| Massawe et al., 2003 | Tanzania | rural | Study on effects of land preparation on spatial distribution of crop pest rodents |
| Ojwang & Oguge, 2003 | Kenya | rural | Test of owl-based biological control program against pest rodents |
| Sichilima et al., 2003 | Zambia | rural | Study of local plants and land preparation on subterrean pest rodents |
| Stenseth et al., 2003 | modelling | rural | Modelling of the economics of pest rodent damages and management |
| von Maltitz et al., 2003 | South Africa | rural | Overview of development of a rodent management program at a province level |
| Potter, 2004 | South Africa | rural | Test of owl-based biological control program against pest rodents |
| Makundi et al., 2005 | Ethiopia, Tanzania | rural | Survey of farmers' perceptions, knowledge, attitudes and practices in regards to pest rodent management |
| Massawe et al., 2005 | Tanzania | rural | Study of the effect of land preparation and vegetation cover on abundance of crop pest rodents |
| Mulungu et al., 2005 | Tanzania | rural | Fine-scale study of rodent-associated damages in maize fields |
| Holt et al., 2006 | modelling | rural | Modelling of the impact of rodent control on a rodent-borne disease dynamics |
| Skonhoft et al., 2006 | modelling | rural | Modelling of the economics of pest rodent management |
| Makundi et al., 2007 | Tanzania | rural | Experimental test of crop storage strategies aiming at the mitigation of rodent-associated losses |
| Mohr et al., 2007 | Tanzania | urban | Study of mobility in pest rodents |
| Belmain et al., 2008 | Southern Africa | rural | Global presentation of the EcoRat project |
| Drazo et al., 2008 | DR Congo | rural | Surveys on farmers' perception of rodent crop damages and rodent control techniques used |
| Taylor et al., 2008 | South Africa | urban | Comparative investigation of rodent-associated zoonotic risk in socio-economically contrasted urban areas |
| Sluydts et al., 2009 | Tanzania | rural | Research on pest rodent biology in a control perspective |
| Meheretu et al., 2010 | Ethiopia | rural | Survey of farmers' perceptions on pest rodent damages and management |
| Makundi & Massawe, 2011 | Africa | rural | Review of potential and challenges in EBRM |
| Massawe et al., 2011 | Tanzania, Namibia, Swaziland | rural | Research on pest rodent biology in a control perspective |
| Mulungu et al., 2011 | Namibia, Tanzania, South Africa, Swaziland | rural | Global presentation of the EcoRat project |
| Garba et al., 2014 | Niger | urban | Surveys on city dwellers' perception of rodent-associated issues |
| Mulungu et al., 2014 | Tanzania | rural | Research on pest rodent biology in a control perspective |
| Mulungu et al., 2015 | Tanzania | rural | Research on pest rodent biology in a control perspective |
| Labuschagne et al. 2016 | Worldwide (not particularly focused on Africa) | rural | Reviewed of the impacts and effectiveness of avian predation on rodent pests |
| Mahlaba et al., 2017 | Swaziland | rural | Evaluation of the impact of domestic cats and dogs on rodent behavior |
| Swanepoel et al., 2017 | Afro-Malagasy region | rural | Review on pest rodent research in farming ecosystems |
| Soarimalala et al., 2019 | Madagascar | rural | Study of the levels of rodent damages and of rodent control systems |
| Constant et al., 2020 | Madagascar, South Africa, Tanzania | rural | Comparative assessment of rodent impacts and cultural perceptions of EBRM |
| Dossou et al., 2020 | Benin | urban | Study on economic losses due to rodent damages to food stocks in harbor, and proposed environmental management procedures |
| Mulungu et al., 2020 | Africa | rural | Review on rodent control in maize cropping system in African agro-ecosystems |
| Tomass et al., 2020 | Ethiopia | rural | Survey of farmers' perceptions on pest rodent damages and management |
| Williams et al., 2021 | South Africa | rural | Evaluation of the efficiency of low-intensity environmental education on cultural taboos in the context of EBRM implementation |
| Meheretu et al., 2022 | Ethiopia | rural | Stored-grain losses and management practices in smallholder cereal farming |
| Meheretu et al., 2022 | Malawi | rural | EBRM to simultaneously reduce yield losses by rodents and the risks of rodent-associated zoonosis in an environmentally friendly manner |
